# Supplementary material for: Effect of Heating on Physicochemical Property of Aerosols during Vaping
Source: MDPI journal article supplement (doi:10.3390/ijerph19031892), 2022-02-08
Supplement: s1 [file s1]

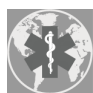

## Supplementary Material— Effect of heating on physicochemical property of aerosols during vaping

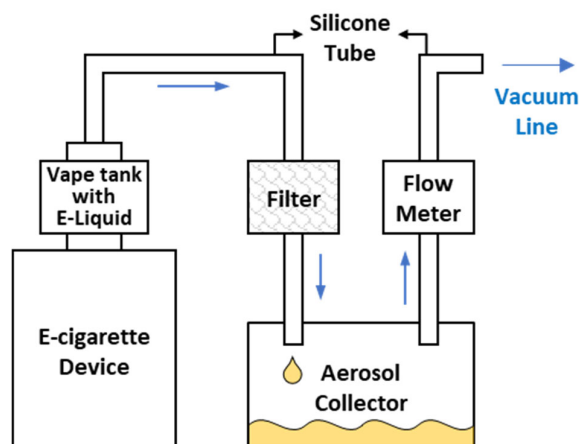

**Figure S1.** A schematic of the experiment setup with an e-cigarette aerosol collecting system.

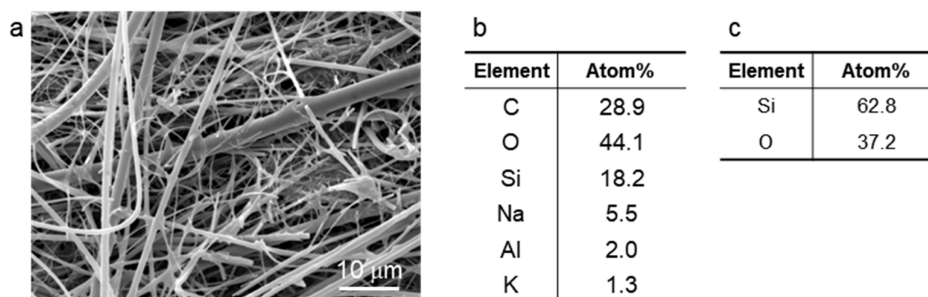

**Figure S2. Structural and chemical analysis on a glass fiber filter and rubber tube.** (a) An SEM image of a glass fiber filter surface. Atomic concentration analysis on (b) a glass fiber filter and (c) a silicone rubber tubing surface using EDS.
